# Supplementary material for: A polydiacetylene (PDA) impregnated poly(vinylidene fluoride) (PVDF) membrane for sensitive detection of fluoride ions
Source: Royal Society of Chemistry journal article supplement (doi:10.1039/d2an00848c), 2022-01-01
Supplement: d2an00848c1.pdf [file d2an00848c1.pdf]

## Supporting Information

### Polydiacetylene (PDA) Impregnated Poly(vinylidene fluoride) (PVDF)

#### Membrane for Sensitive Detection of Fluoride Ions

Ankit Thakuri,<sup>a</sup> Raghunath Acharya,<sup>b,c</sup> Mainak Banerjee,<sup>\*a</sup> and Amrita Chatterjee<sup>\*a</sup>

<sup>a</sup>Department of Chemistry, BITS-Pilani, K.K. Birla Goa Campus, NH 17B, Bypass Road, Zuarinagar, Sancoale, Goa-403726, INDIA.

<sup>b</sup>Radiochemistry Division, Bhabha Atomic Research Centre, Trombay, Mumbai-400085, INDIA.

<sup>c</sup>Homi Bhabha National Institute, Anushaktinagar, Mumbai-400085, INDIA.

\*Email id: [amrita@goa.bits-pilani.ac.in](mailto:amrita@goa.bits-pilani.ac.in), [mainak@goa.bits-pilani.ac.in](mailto:mainak@goa.bits-pilani.ac.in)

#### Table of contents

| Sr. No. | Title                                                                                   | Page No. |
|---------|-----------------------------------------------------------------------------------------|----------|
| 1       | Images of the experimental setup of <b>PDABA@PVDF</b> membrane based fluoride detection | S2       |
| 2       | Synthesis of the probe <b>PDABA</b>                                                     | S2       |
| 3       | NMR Spectra of <b>PDABA</b>                                                             | S3       |
| 4       | IR spectra                                                                              | S4       |
| 5       | HRMS spectra of <b>PDABA</b>                                                            | S5       |
| 6       | Images of strips with varying PCDA: <b>PDABA</b> ratio                                  | S5       |
| 7       | Images of <b>PDABA@PVDF</b> strips under long UV (365 nm)                               | S6       |
| 8       | Liposome Preparation                                                                    | S5       |
| 9       | Variation in response time with concentration                                           | S6       |
| 10      | Linear trend in response of <b>PDABA@PVDF</b> strips towards fluoride.                  | S7       |
| 11      | Comparison of <b>PDABA@PVDF</b> membranes with IC for fluoride detection                | S7       |
| 12      | Comparative table of solid-phase detection of fluoride ions                             | S9       |
| 13      | References                                                                              | S11      |

## 1. Experimental setup

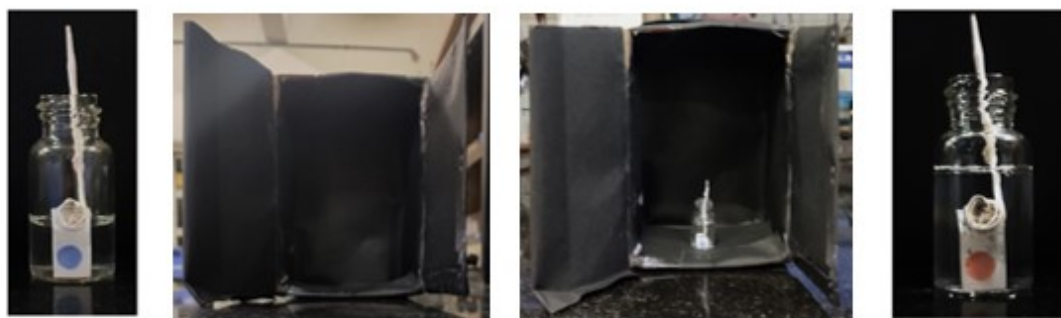

**Figure S1:** Images of the experimental setup of PDABA@PVDF membrane based fluoride detection.

## 2. Synthesis of the probe PDABA<sup>1</sup>

10,12-Pentacosadiynoic acid (0.374 g, 1 mmol) was dissolved in dichloromethane (5 mL) and to the solution, oxalyl chloride (0.3 mL, 3.5 mmol) was added dropwise under nitrogen atmosphere. After 1 h of stirring, one drop of DMF was added to the solution, and the resulting mixture was stirred for another 4 h. After the solvent was evaporated, the crude acid chloride was dissolved in 5 mL anhydrous THF, placed in an ice bath under nitrogen atmosphere and to it, a solution of 4-hydroxyphenyl boronic acid (0.41 g, 3 mmol) and triethylamine (1.4 mL, 10 mmol) in 5 mL of THF was slowly added and the mixture was stirred overnight at room temperature. The crude residue obtained after solvent removal was dissolved in a small amount of methanol and was added dropwise to cold water. The precipitates formed were collected and subjected to column chromatography on a silica gel and eluted with dichloromethane-methanol (10:1) to give the desired product (yield 67%). <sup>1</sup>H NMR (400 MHz, CDCl<sub>3</sub>): δ (ppm) 8.24 (d, *J* = 8 Hz, 2H), 2.61–2.54 (m, 2H), 2.28–2.22 (m, 4H), 1.82–1.73 (m, 2H), 1.53–1.47 (m, 4H), 1.41–1.25 (m, 26H), 0.87 (t, *J* = 8 Hz, 3H); <sup>13</sup>C NMR (100 MHz, CDCl<sub>3</sub>) δ 172.3, 153.0, 135.2, 129.8, 121.1, 65.3, 46.0, 34.4, 31.9, 29.6, 29.5, 29.4, 29.1, 28.9, 28.8, 28.4, 28.3, 24.9, 22.7, 19.2, 14.1; IR (ν, ATR): 3318, 2916, 2851, 1751, 1600, 1469, 1348, 1220, 1117, 1016, 807, 719 cm<sup>-1</sup>; HRMS (ESI, *m/z*) calcd for C<sub>31</sub>H<sub>47</sub>BO<sub>4</sub> [M+H]<sup>+</sup> 495.3646, found: 495.3649.

### 3. <sup>1</sup>H NMR spectra

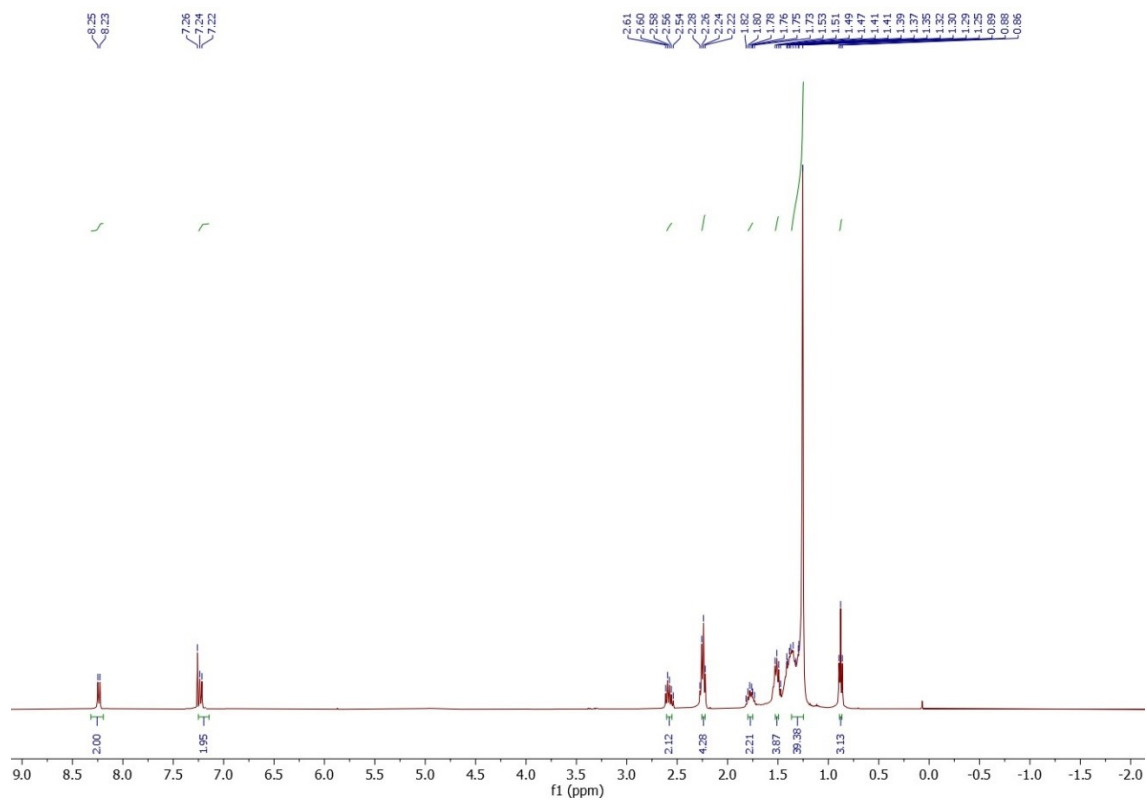

**Figure S2.** <sup>1</sup>H NMR (400 MHz, CDCl<sub>3</sub>) spectra of PDABA.

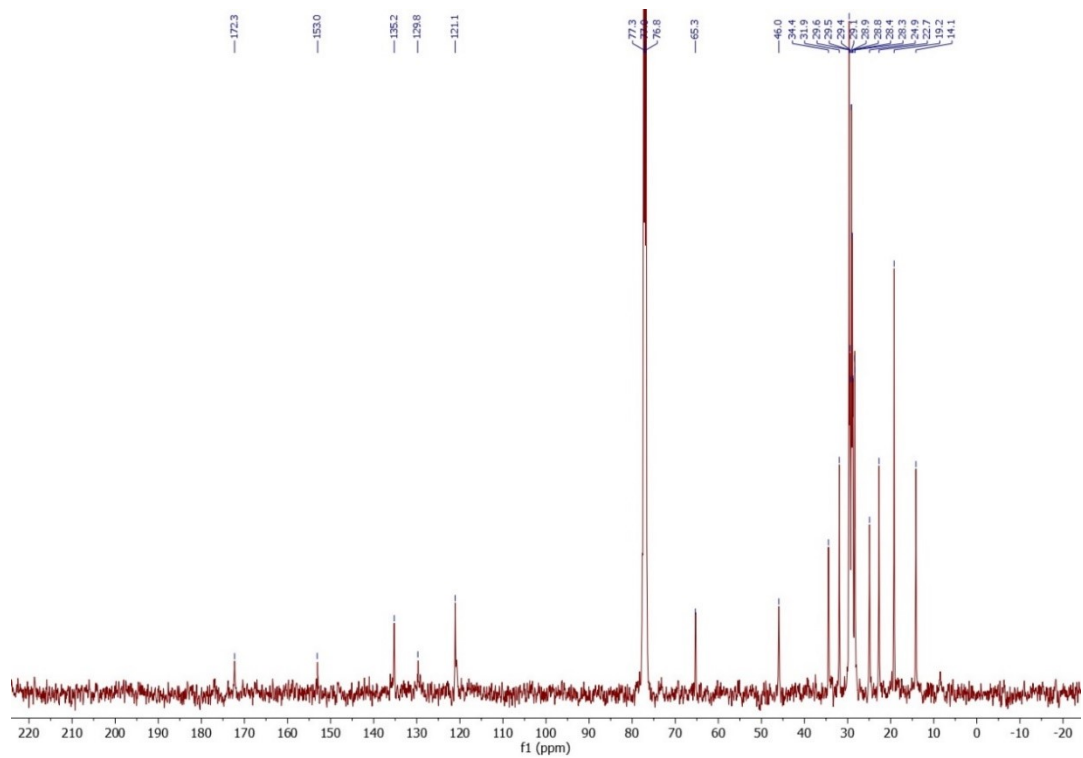

**Figure S3.** <sup>13</sup>C NMR (100 MHz, CDCl<sub>3</sub>) spectra of PDABA.

#### 4. IR spectra of PCDA and PDABA

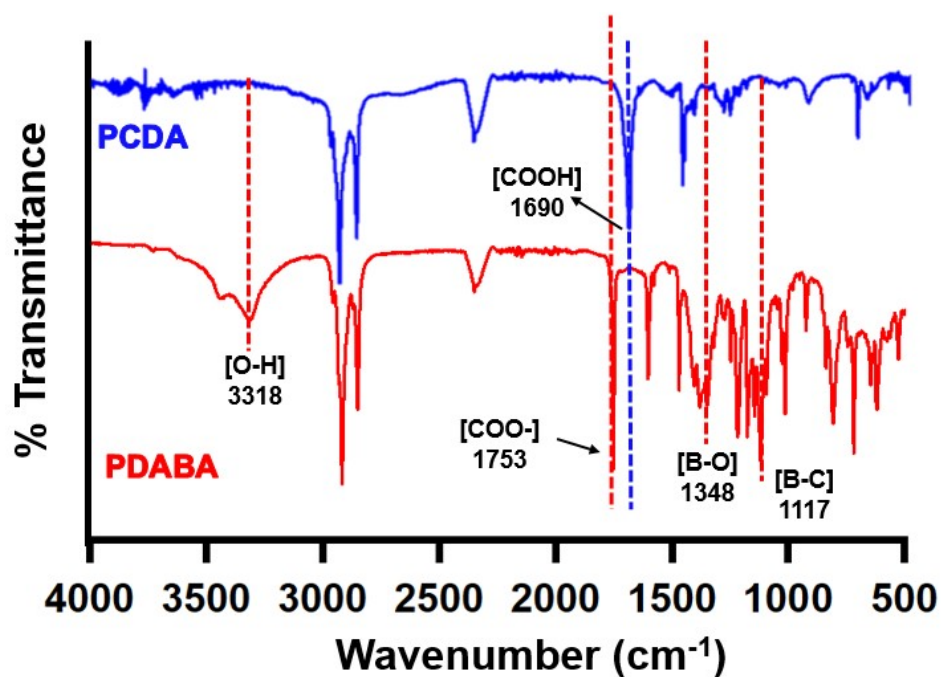

Figure S4. IR spectra of PCDA (blue) and PDABA (red).

#### 5. HRMS spectra

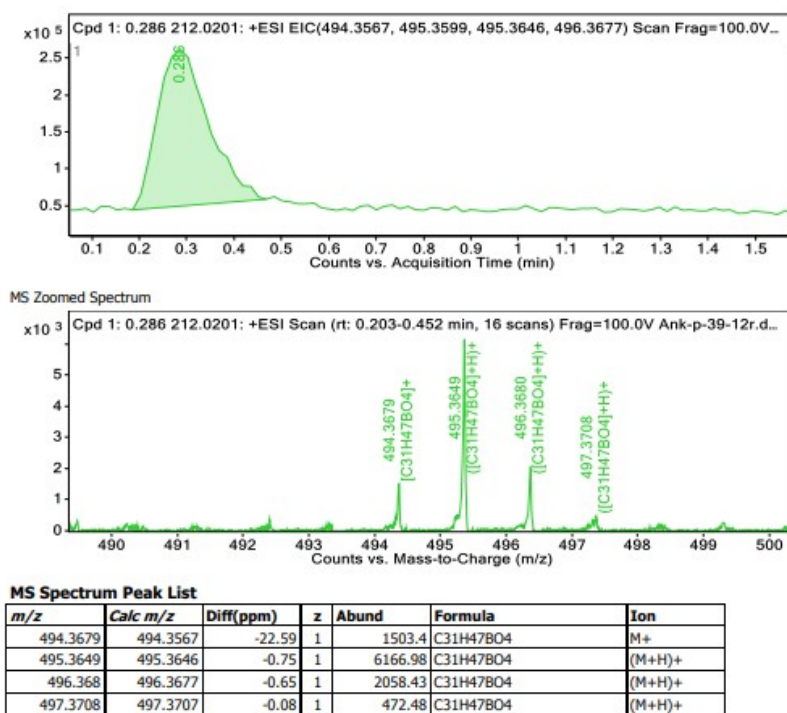

Figure S5. HRMS spectra of PDABA.

## 6. Strips bearing different compositions of PCDA: PDABA

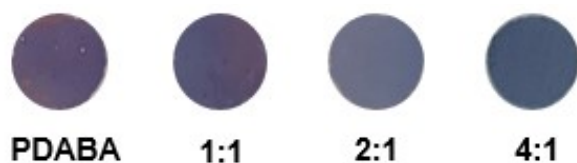

**Figure S6:** Images of strips prepared using varying concentrations of PCDA:PDABA. The strips were dipped irradiated for 1 min under UV light (254 nm) and the images were taken after 5 min.

## 7. Images of strips under UV

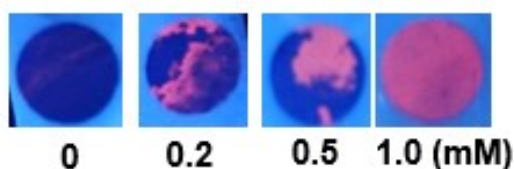

**Figure S7:** Fluorescent images of PDABA@PVDF strips dipped in fluoride solution for 1 h and images were taken under long UV light (365 nm).

## 8. Liposome preparation

For the preparation of liposomes the mixture of PCDA:PDABA was dissolved in chloroform and then, the organic solvent was evaporated under nitrogen flow, and HEPES buffer (10 mM, pH 7.4) was added to attain a total concentration of 1 mM. The solution was then probe-sonicated at 80 °C for 20 min to afford a turbid solution. The suspension was then filtered through a syringe filter (0.45  $\mu\text{m}$ ) and stored overnight at 4 °C. This liposome suspension was then utilized for fluoride detection.

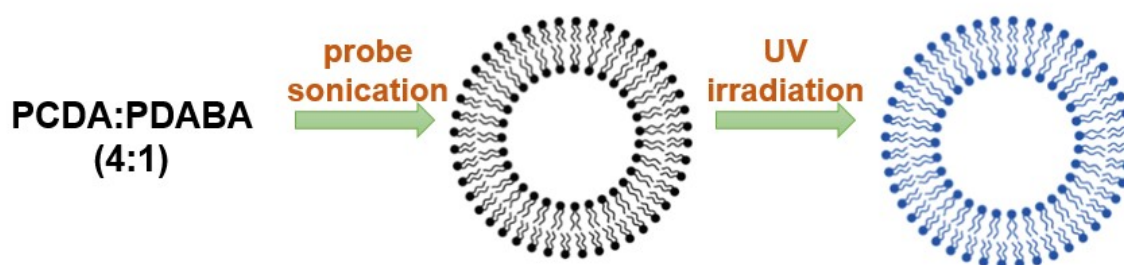

**Figure S8.** Schematic representation of liposome formation between PCDA and PDABA.

## 9. Variation in response time with concentration

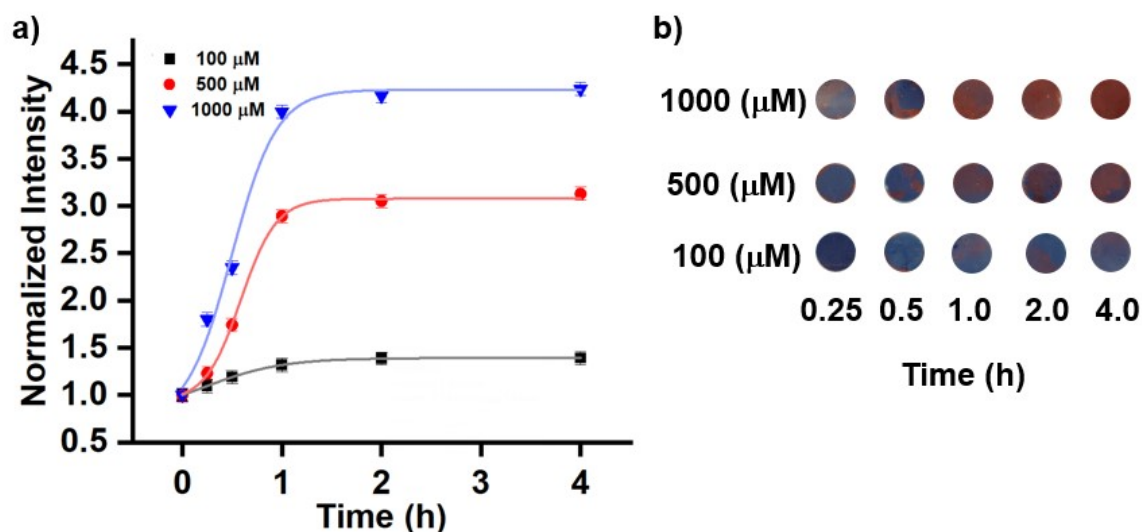

**Figure S9.** (a) Response-time variation of the PDABA@PVDF strips against different concentrations of fluoride. The RGB data were collected using the images captured through three different cameras viz. Mi 10i (108 MP), Redmi Note 8 pro (64 MP), Redmi Note 9 pro max (64 MP) and the average value of the data were presented. (b) Images of the strips exposed to different concentrations for varying times.

## 10. Linear trend in response of PDABA@PVDF strips towards fluoride.

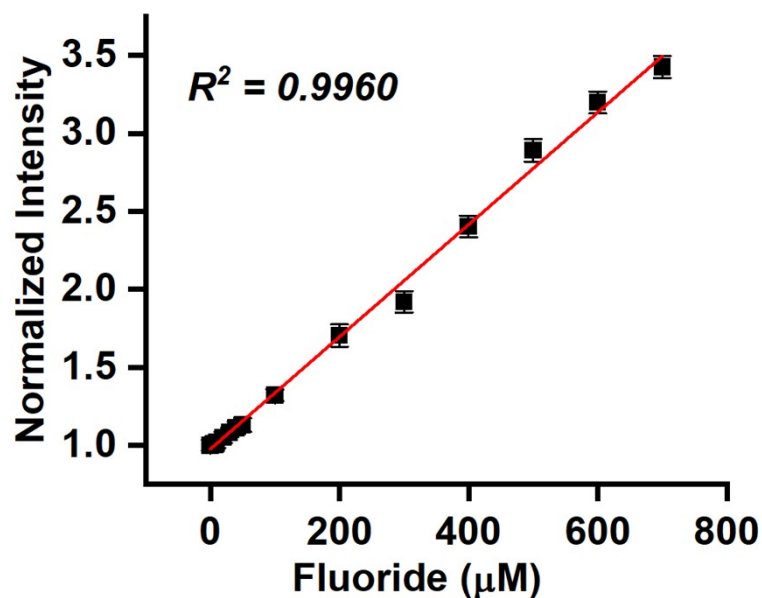

**Figure S10.** Response of PDABA@PVDF strips against higher concentration of fluoride.

### 11. Comparison of PDABA@PVDF membranes with IC for fluoride detection in real samples

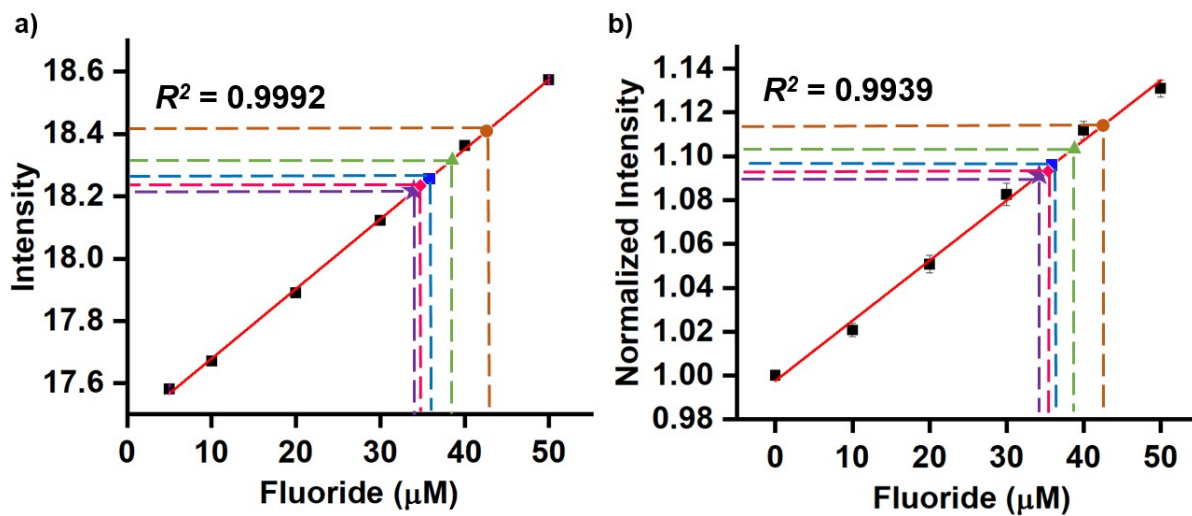

**Figure S11.** Fluoride ion content analysis of different toothpaste via (a) IC and (b) PDABA@PVDF strips (five different toothpaste were used).

## 12. Comparative table of molecular sensor based solid-phase detection of fluoride ions

| Sr. No. | Probe structure                                                                     | Solid platform | Mode of detection | LOD ( $\mu\text{M}$ ) | Time     | Working range ( $\mu\text{M}$ ) | Ref. |
|---------|-------------------------------------------------------------------------------------|----------------|-------------------|-----------------------|----------|---------------------------------|------|
| 1       | 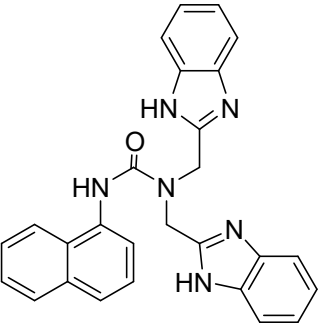   | Filter paper   | Fluorimetric      | 100                   | < 2 min  | NA                              | S2   |
| 2       |    | NA             | Fluorimetric      | NA                    | < 2 min  | NA                              | S3   |
| 3       |   | Organogel      | Colorimetric      | NA                    | < 30 sec | NA                              | S4   |
| 4       |  | Filter paper   | Fluorimetric      | 157                   | < 2 min  | NA                              | S5   |



|   |                                                                                                                                                         |                 |                                 |      |          |        |           |
|---|---------------------------------------------------------------------------------------------------------------------------------------------------------|-----------------|---------------------------------|------|----------|--------|-----------|
| 5 | 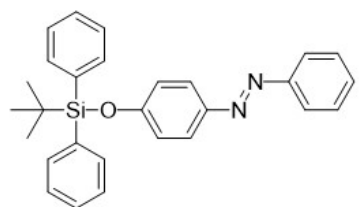                                                                       | Filter paper    | Colorimetric                    | 60   | < 30 sec | 60-250 | S6        |
| 6 |                                                                        |                 | Colorimetric                    | 520  | < 2 min  | NA     | S7        |
| 7 |  <p><sup>+</sup>Na<sup>-</sup>O<sub>3</sub>S</p> <p>SPADNS reagent</p> | Micropad (μPAD) | Colorimetric                    | 6.85 | 2 min    | 12-118 | S8        |
| 8 | PCDA:PDABA                                                                                                                                              | PVDF membrane   | Colorimetric and Image Analysis | 6    | 60 min   | 0-700  | This work |

### 13. References

1. S. Lee, K. M. Lee, M. Lee and J. Yoon, *ACS Appl. Mater. Interfaces*, 2013, **5**, 4521–4526.
2. N. Borah, B. Nayak, A. Gogoi, and G. Das, *New J. Chem.*, 2019, **43**, 16497–16505.
3. T. Chaudhuri, A. Mondal and C. Mukhopadhyay, *J. Mol. Liq.* 2018, **251**, 35–39.
4. Y. Chen, B. Bai, Q. Chai, M. Zhang, J. Wei, H. Wang and M. Li, *Soft Matter*, 2019, **15**, 6690–6695.
5. M. Anju, A. K. Akhila, and N. K. Renuka, *Nano-Struct. Nano-Objects*, 2020, **24**, 100606.
6. Y. S. Choi, N. Kim, K.-J. Jang, H.-J.; Choi, S. Shin, and S. W. Bae, *Bull. Korean Chem. Soc.* 2021, **42**, 176–179.
7. Z.-H. Lin, S.-J. Ou, C.-Y. Duan, B.-G. Zhang, and Z.-P.; Bai, *Chem. Commun.* 2006, 624–626.
8. E. Vidal, A. S. Lorenzetti, A. G. Lista, and C. E. Domini, *Microchem. J.* 2018, **143**, 467–4.
